# Supplementary material
Source: HighWire-hosted journal article supplement (https://www.cmajopen.ca/highwire/filestream/89209/field_highwire_adjunct_files/2/open-2022-0006-3-at.pdf)
Supplement: open-2022-0006-3-at.pdf [file open-2022-0006-3-at.pdf]

### Appendix 3: Administrative datasets used in this study

| Dataset                                                                     | Description                                                                                                                                                                                                                 | Variables                                                              |
|-----------------------------------------------------------------------------|-----------------------------------------------------------------------------------------------------------------------------------------------------------------------------------------------------------------------------|------------------------------------------------------------------------|
| Registered Persons Database (RPDB)                                          | A population-based registry that contains demographic information for all residents of Ontario who have registered for health insurance.                                                                                    | Age, Sex, Geographic location, Death                                   |
| Canadian Institute for Health Information Discharge Abstract Database (DAD) | Contains administrative and clinical information on all admissions/discharges from acute care facilities in Ontario                                                                                                         | Inpatient hospital episodes, readmissions, chronic conditions, , costs |
| National Ambulatory Care Reporting System (NACRS)                           | Contains patient-level data (demographic, diagnoses, procedures) for all visits made to hospital and community based ambulatory care centres (emergency departments, day surgery, dialysis, cancer care clinics) in Ontario | Emergency department visits, costs                                     |
| Ontario Mental Health Reporting System (OMHRS)                              | Contains data on adult designated inpatient mental health beds (incl. general, provincial psychiatric, and specialty psychiatric facilities) using the Resident Assessment Instrument - Mental Health                       | costs                                                                  |
| Ontario Health Insurance Plan Claims Database (OHIP)                        | Claims for all physician services provided to Ontario residents                                                                                                                                                             | Chronic conditions, physician visits, post-discharge follow up, costs  |
| Institute for Clinical Evaluative Sciences Physician Database (IPDB)        | Yearly information on all physicians practicing in Ontario, including main specialty                                                                                                                                        | Physician visits                                                       |
| Client Agency Program Enrolment (CAPE)                                      | Contains a roster of patients that have registered with a primary care organization in Ontario, including a patients' association to specific physician and enrolment model type                                            | Cost                                                                   |
| National Rehabilitation Reporting System (NRS)                              | Contains client data collected from adult inpatient rehabilitation facilities in Ontario                                                                                                                                    | Cost                                                                   |
| Corporate Provider Database (CPDB)                                          | Contains information about health care providers in Ontario, including program eligibility information                                                                                                                      | Cost                                                                   |
| 2006 Canadian Census (Census)                                               | Contains aggregated, area-level data for Ontario and Canada that describes demographic information of the population, including markers not captured with health administrative data                                        | Rurality, Income                                                       |
| Continuing Care Reporting System (CCRS)                                     | Contains clinical and demographic information on residents receiving facility-based continuing care services in Ontario                                                                                                     | Costs                                                                  |
| Home Care Database (HCD)                                                    | Visits for all publicly-funded home care services provided to Ontario residents                                                                                                                                             | Costs                                                                  |
| Ontario Drug Benefit Claims (ODB)                                           | Contains information on public and private patient prescription claims for drug benefits                                                                                                                                    | Chronic conditions, costs                                              |
| Same Day Surgery Database (SDS)                                             | Information on same day surgeries performed in Ontario                                                                                                                                                                      | Chronic conditions, costs                                              |
| Yearly Health Services Contact (CONTACT)                                    | Contains data on eligibility for services covered under OHIP                                                                                                                                                                | Ontario Health Insurance Plan (OHIP) eligibility                       |

Appendix 3, as supplied by the authors. Appendix to: Ryan BL, Mondor L, Wodchis WP, et al. Effect of a multimorbidity intervention on health care utilization and costs in Ontario: randomized controlled trial and propensity-matched analyses. *CMAJ Open* 2023. doi:10.9778/cmajo.2022-0006. Copyright © 2023 The Author(s) or their employer(s). To receive this resource in an accessible format, please contact us at [cmajgroup@cmaj.ca](mailto:cmajgroup@cmaj.ca).
